# Supplementary figures and images for: Twelve Months of Time-Restricted Feeding Improves Cognition and Alters Microbiome Composition Independent of Macronutrient Composition
Source: MDPI journal article supplement (doi:10.3390/nu14193977), 2022-09-24

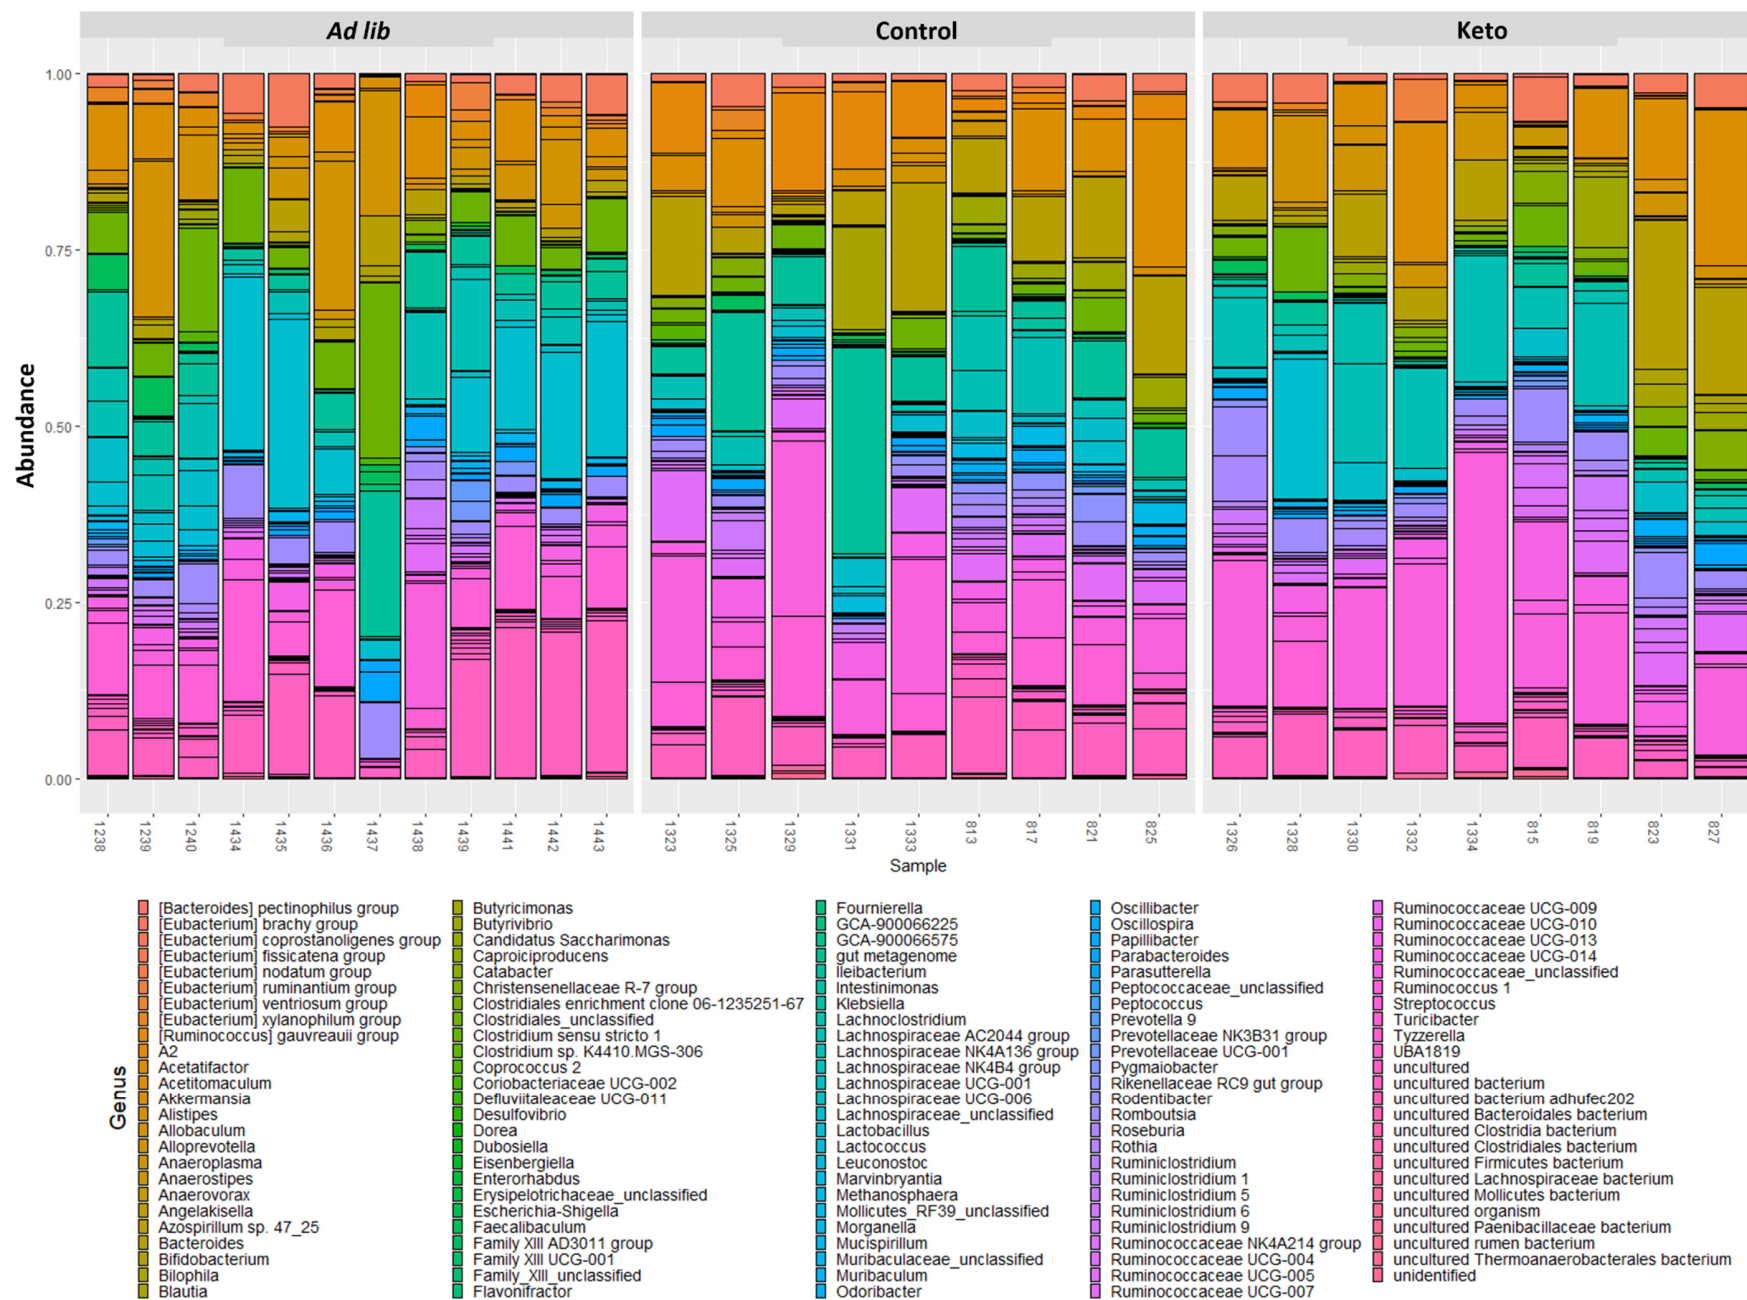

Supplemental Figure S1: Relative abundance at the genus taxonomic level.

Supplement: s1 [file s1]
